# Supplementary material for: Amaranth Protein Hydrolysates Efficiently Reduce Systolic Blood Pressure in Spontaneously Hypertensive Rats
Source: PubMed Central journal article supplement (PMC6150404; doi:10.3390/molecules22111905), 2017-11-09
Supplement: molecules-22-01905-s001.pdf [file molecules-22-01905-s001.pdf]

**Table S1.** Response Surface Analysis. Worksheet .

| Order | Order Std. | Central points | Blocks | A* | B* | C*   | D* |
|-------|------------|----------------|--------|----|----|------|----|
| 1     | 43         | 1              | 2      | 6  | 5  | 0.04 | 48 |
| 2     | 51         | 0              | 2      | 7  | 5  | 0.04 | 48 |
| 3     | 49         | 1              | 2      | 7  | 5  | 0.04 | 36 |
| 4     | 33         | 1              | 2      | 6  | 8  | 0.06 | 36 |
| 5     | 48         | 1              | 2      | 7  | 5  | 0.06 | 48 |
| 6     | 36         | 1              | 2      | 8  | 2  | 0.02 | 60 |
| 7     | 40         | 1              | 2      | 8  | 2  | 0.06 | 60 |
| 8     | 39         | 1              | 2      | 6  | 2  | 0.06 | 60 |
| 9     | 32         | 1              | 2      | 8  | 2  | 0.06 | 36 |
| 10    | 34         | 1              | 2      | 8  | 8  | 0.06 | 36 |
| 11    | 30         | 1              | 2      | 8  | 8  | 0.02 | 36 |
| 12    | 27         | 1              | 2      | 6  | 2  | 0.02 | 36 |
| 13    | 50         | 1              | 2      | 7  | 5  | 0.04 | 60 |
| 14    | 52         | 0              | 2      | 7  | 5  | 0.04 | 48 |
| 15    | 45         | 1              | 2      | 7  | 2  | 0.04 | 48 |
| 16    | 31         | 1              | 2      | 6  | 2  | 0.06 | 36 |
| 17    | 38         | 1              | 2      | 8  | 8  | 0.02 | 60 |
| 18    | 37         | 1              | 2      | 6  | 8  | 0.02 | 60 |
| 19    | 42         | 1              | 2      | 8  | 8  | 0.06 | 60 |
| 20    | 44         | 1              | 2      | 8  | 5  | 0.04 | 48 |
| 21    | 41         | 1              | 2      | 6  | 8  | 0.06 | 60 |
| 22    | 29         | 1              | 2      | 6  | 8  | 0.02 | 36 |
| 23    | 46         | 1              | 2      | 7  | 8  | 0.04 | 48 |
| 24    | 35         | 1              | 2      | 6  | 2  | 0.02 | 60 |
| 25    | 47         | 1              | 2      | 7  | 5  | 0.02 | 48 |
| 26    | 28         | 1              | 2      | 8  | 2  | 0.02 | 36 |
| 27    | 5          | 1              | 1      | 6  | 2  | 0.06 | 36 |
| 28    | 14         | 1              | 1      | 8  | 2  | 0.06 | 60 |
| 29    | 10         | 1              | 1      | 8  | 2  | 0.02 | 60 |
| 30    | 3          | 1              | 1      | 6  | 8  | 0.02 | 36 |
| 31    | 4          | 1              | 1      | 8  | 8  | 0.02 | 36 |
| 32    | 6          | 1              | 1      | 8  | 2  | 0.06 | 36 |
| 33    | 21         | 1              | 1      | 7  | 5  | 0.02 | 48 |
| 34    | 2          | 1              | 1      | 8  | 2  | 0.02 | 36 |
| 35    | 12         | 1              | 1      | 8  | 8  | 0.02 | 60 |
| 36    | 20         | 1              | 1      | 7  | 8  | 0.04 | 48 |
| 37    | 19         | 1              | 1      | 7  | 2  | 0.04 | 48 |
| 38    | 1          | 1              | 1      | 6  | 2  | 0.02 | 36 |
| 39    | 9          | 1              | 1      | 6  | 2  | 0.02 | 60 |
| 40    | 13         | 1              | 1      | 6  | 2  | 0.06 | 60 |
| 41    | 15         | 1              | 1      | 6  | 8  | 0.06 | 60 |
| 42    | 25         | 0              | 1      | 7  | 5  | 0.04 | 48 |
| 43    | 16         | 1              | 1      | 8  | 8  | 0.06 | 60 |
| 44    | 24         | 1              | 1      | 7  | 5  | 0.04 | 60 |
| 45    | 26         | 0              | 1      | 7  | 5  | 0.04 | 48 |
| 46    | 22         | 1              | 1      | 7  | 5  | 0.06 | 48 |
| 47    | 11         | 1              | 1      | 6  | 8  | 0.02 | 60 |

|    |    |   |   |   |   |      |    |
|----|----|---|---|---|---|------|----|
| 48 | 23 | 1 | 1 | 7 | 5 | 0.04 | 36 |
| 49 | 18 | 1 | 1 | 8 | 5 | 0.04 | 48 |
| 50 | 8  | 1 | 1 | 8 | 8 | 0.06 | 36 |
| 51 | 17 | 1 | 1 | 6 | 5 | 0.04 | 48 |
| 52 | 7  | 1 | 1 | 6 | 8 | 0.06 | 36 |

---

**\*A:pH; B: time(h); C: enzyme concentration (mU/mg of protein); D: temperature (°C).**
